# Supplementary material for: p70S6K is regulated by focal adhesion kinase and is required for Src-selective autophagy
Source: PubMed Central journal article supplement (PMC4508348; doi:10.1016/j.cellsig.2015.05.017), 2015-09

Supplementary Figure 1 Src phosphorylation is not reduced by kinase inhibitors A-F

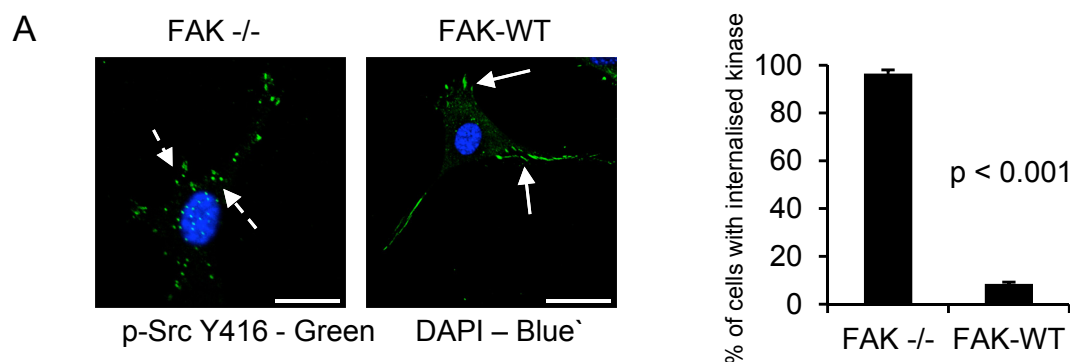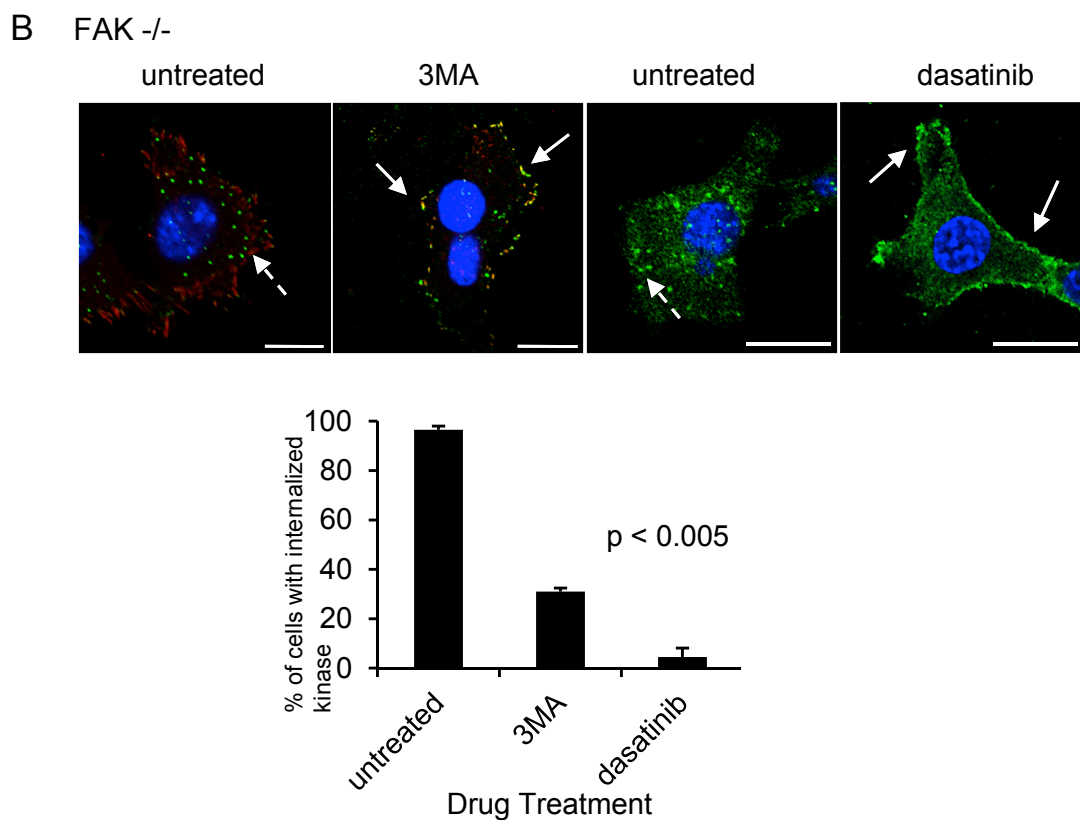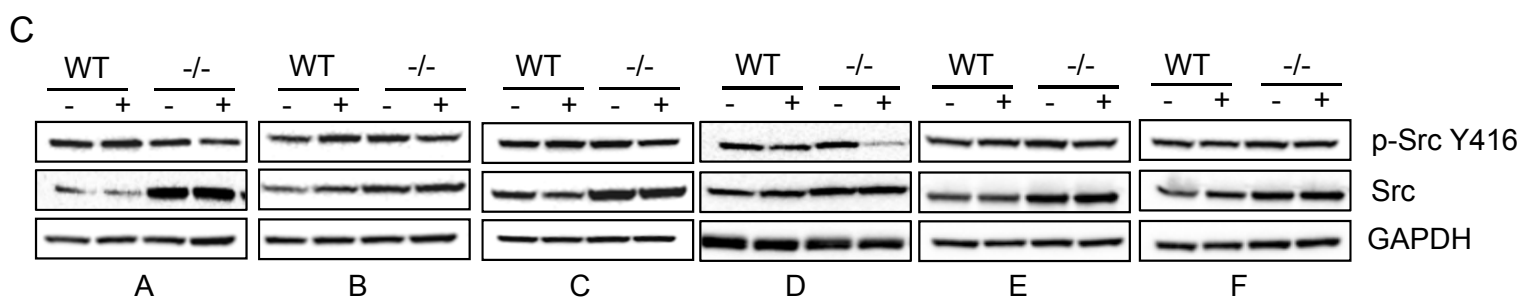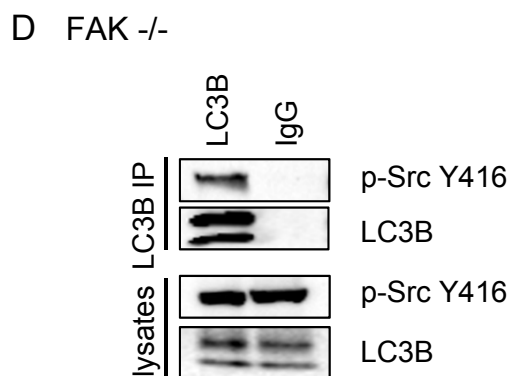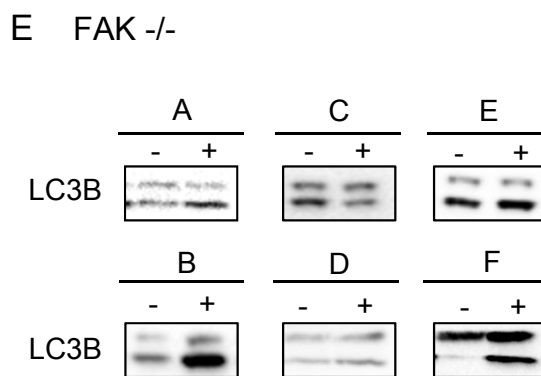

Supplementary Figure 2 Kinase inhibitors A-F do not affect mTOR phosphorylation

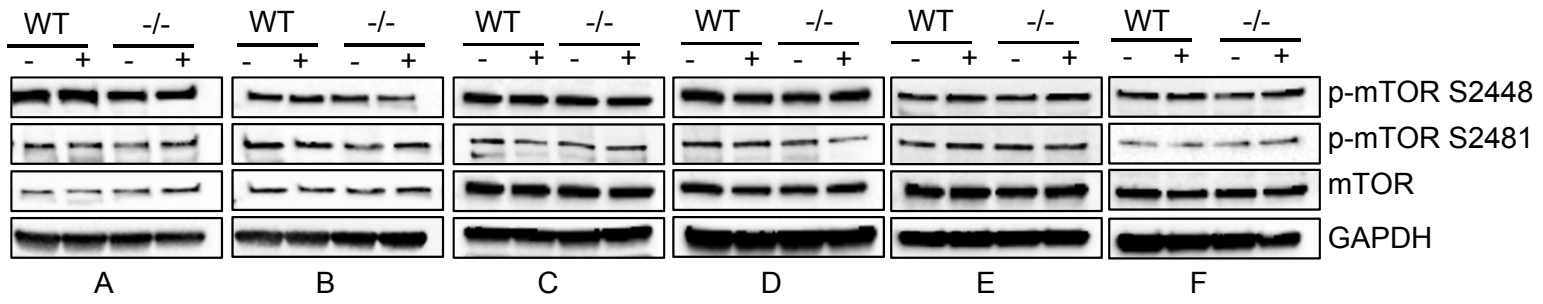

Supplement: mmc1.pdf [file mmc1.pdf]
